1            **Use of a scoring strategy to determine clinical risk of**  
2            **progression and risk group-specific treatment adherence in**  
3            **subjects with latent tuberculosis infection**

4            Michael Sclarici (MS)<sup>¶</sup>, Ken Dekitani (KD)<sup>¶</sup>, Ling Chen<sup>‡</sup>, Marcia Sokol-Anderson (MSA)\*  
5            Daniel F Hoft (DFH)\*, Soumya Chatterjee (SC)\*

6  
7            \*Division of Infectious Diseases, Allergy and Immunology, Department of Internal Medicine, St  
8            Louis University, St Louis, MO

9            <sup>¶</sup>St Louis University School of Medicine, St Louis, MO

10          <sup>‡</sup>Division of Biostatistics, Washington University in St. Louis School of Medicine, St Louis, MO

11  
12          Key words: Latent tuberculosis, risk assessment, treatment adherence

13  
14          Running title: Risk assessment in latent tuberculosis

15  
16  
17  
18  
19  
20  
21          Corresponding author: Soumya Chatterjee, Division of Infectious Diseases, Allergy & Immunology,  
22          Department of Internal Medicine, Saint Louis University, Doisy Research Center, 8th floor, 1100 S.  
23          Grand Blvd., Rm 825 St. Louis, MO 63104

24          Phone: 314-977-9046, Fax: 314-771-3816, e-mail: [chatterjees@slu.edu](mailto:chatterjees@slu.edu)

25          MS and KD contributed equally to this manuscript

29

## 30 **ABSTRACT**

### 31 **Background**

32 Annual incidence of active tuberculosis (TB) cases has plateaued in the US from 2013-2015.  
33 Most cases are from reactivation of latent tuberculosis infection (LTBI). A likely contributor is  
34 suboptimal LTBI treatment completion rates in subjects at high risk of developing active TB. It  
35 is unknown whether these patients are adequately identified and treated under current standard of  
36 care.

### 37 **Methods**

38 In this study, we sought to retrospectively assess the utility of an online risk calculator  
39 (tstin3d.com) in determining probability of LTBI and defining the characteristics and treatment  
40 outcomes of Low: 0-<10%, Intermediate: 10-<50% and High: 50-100% risk groups of  
41 asymptomatic subjects with LTBI seen between 2010-2015.

42

### 43 **Results**

44 51(41%), 46 (37%) and 28 (22%) subjects were in Low, Intermediate and High risk groups  
45 respectively. Tstin3d.com was useful in determining the probability of LTBI in tuberculin skin  
46 test positive US born subjects. Of 114 subjects with available treatment information, overall  
47 completion rate was 61% and rates of completion in Low (60%), Intermediate (63%) and High  
48 (57%) risk groups were equivalent. 75% subjects in the 3HP group completed treatment

49 compared to 58% in the INH group. Provider documentation of important clinical risk factors  
50 was often incomplete. Logistic regression analysis showed no clear trends of treatment  
51 completion being associated with assessment of a risk factor.

## 52 **Conclusion**

53 These findings suggest *tstin3d.com* could be utilized in the US setting for risk stratification of  
54 patients with LTBI and select treatment based on risk. Current standard of care practice leads to  
55 subjects in all groups finishing treatment at equivalent rates.

## 56 **Introduction**

57 One third of the world population is estimated to have LTBI [1], a state of infection caused by  
58 *Mycobacterium tuberculosis* (Mtb) characterized by temporary immune containment of the  
59 bacteria and lack of any clinical or microbiologic evidence of active tuberculosis (TB). As these  
60 subjects have no evidence of disease, they can currently be diagnosed only by measuring the  
61 cutaneous Delayed Type Hypersensitivity reaction (tuberculin skin test, TST) or by measuring  
62 production of Interferon- $\gamma$  in the blood using interferon- $\gamma$  release assays (IGRAs) [2]. It is  
63 estimated that 5-10% of all subjects with LTBI will have a lifetime risk of progression to active  
64 TB disease. Treatment of LTBI decreases the overall burden of active TB by 60-90% [3]. In low  
65 burden TB countries like the US where the overall active TB rates are <10/1000 population, the  
66 management of LTBI is a critical component of the new WHO post-2015 End TB Strategy and  
67 both the CDC and WHO recommend treatment of subjects deemed to have LTBI [4]. However,  
68 TB incidence in the US has plateaued at 3.0 cases per 100,000 persons between 2013-2015  
69 [5]. Although the reasons for this trend are not completely clear, poor rates of completion of  
70 treatment for LTBI (i.e. 50 % or less on average) [6] is a likely contributing factor. In part, poor

71 completion rates are due to prolonged treatment required for all subjects defined to have LTBI  
72 with Isoniazid (INH) for 6-9 months or 4 months of Rifampin. Prolonged treatment with these  
73 drugs also increases chances of liver toxicity thereby limiting adherence. Recently, a 3 month  
74 regimen of weekly INH and Rifapentine (3HP) has been approved by the CDC. 3HP has shown  
75 equivalent efficacy but is resource-intensive because it requires direct observation of the patients  
76 by a healthcare worker. The CDC therefore recommends this regimen only in select clinical high  
77 risk groups [7]. Although certain clinical risk factors such as being infected with HIV, diabetes,  
78 recent contact with an active TB patient or receiving immune modulatory drugs like TNF- $\alpha$   
79 blocker therapy are well known to increase the risk of developing TB disease, data are lacking on  
80 the frequency with which a comprehensive assessment of all clinical risk factors is performed in  
81 subjects with LTBI by health care providers. Provider awareness of a subject being at high risk  
82 of progression to active TB could facilitate completion of treatment in those at high risk.  
83 [www.TSTin3D.com](http://www.TSTin3D.com) is a validated online calculator that combines TST or IGRA screening  
84 results with other clinically pertinent information, to better estimate the positive predictive value  
85 (PPV) of TB infection in a given individual. The calculator also allows for systematic assessment  
86 of additional medical risk factors to calculate an individual's annual and cumulative risk of  
87 progression to active TB. Such assessments not only allow the identification of patients that are  
88 at high risk of progression [8] but could be used to select shorter, supervised regimens to ensure  
89 treatment completion in that group. Therefore, to assess utility of the calculator in a clinical  
90 setting, we used it to perform a retrospective systematic quantification of risk, assessed provider  
91 risk awareness and compared treatment completion rates in subjects at "Low", "Intermediate"  
92 and "High" risk of LTBI reactivation.

93

## 94 **METHODS**

### 95 **Study subjects and data collection**

96 Data were collected retrospectively on 125 adult patients ( $\geq 18$  years and  $\leq 80$  years) with  
97 LTBI that were seen in the Saint Louis University Infectious Diseases outpatient clinic between  
98 January 1, 2010 and December 31<sup>st</sup>, 2015. Patients with LTBI were first screened using ICD9/10  
99 LTBI diagnosis codes, 795.51, 795.52 and R76.11, R76.12 respectively. Patients were included  
100 only if they had a documented positive TST result available at their first visit to the clinic, were  
101 not suspected of having active TB by the clinic physician and had no prior history of treatment  
102 for LTBI or active TB. Patient electronic medical records were reviewed for variables required  
103 by the calculator (TSTin3D.com) to estimate an individual's annual and cumulative risk of LTBI  
104 reactivation. These variables are listed in **Supplemental Methods**. Since TSTin3D.com only  
105 considers race of those born in the USA, data on race was collected only for US born individuals.  
106 Information about type and duration of antibiotic therapy and last known documented follow-up  
107 was recorded to calculate duration of treatment. For patients not able to complete the full course  
108 of LTBI therapy, information about reasons for discontinuation were obtained. The study was  
109 approved by the St Louis University Institutional Review Board. To assess how frequently  
110 healthcare providers comprehensively assess the risk factors affecting the patient's risk of  
111 progression to active TB; we queried the history and physical documented, along with blood and  
112 radiologic testing ordered at initial visit to the Infectious Diseases clinic as noted in the  
113 electronic medical record.

114

115

116

## 117 **Variables generated by the calculator**

118 Using the above data, the calculator was used to generate a positive predictive value (PPV) for  
119 TST performed to detect TB infection. As IGRAs have higher specificity for assessment of Mtb  
120 infection, the calculator assigns a PPV of 98% if IGRA is positive. The positive predictive value  
121 (PPV) of the TST is the patient's probability of having true latent TB infection based on a  
122 positive result. Details of PPV calculations are presented in **Supplemental Methods**.  
123 TSTin3d.com also generated an annual and cumulative risks (up to age 80 years) of progression  
124 to active TB disease as well as the risk of drug induced hepatitis from INH use (details in  
125 **Supplemental Methods**). The baseline annual risk of TB disease calculated by tstin3d.com was  
126 obtained from a large cohort of healthy TST-positive US military recruits followed up for 4 years  
127 [9]. In this algorithm the highest annual risk is assigned (in descending order) to transplantation  
128 requiring immunosuppressant therapy (7.4%), HIV (5%), pulmonary silicosis (3%), chronic renal  
129 failure (requiring hemodialysis) (2.5%), carcinoma of the head and neck(1.6%), close contact of  
130 person with active TB (1.5%) and recent TST/IGRA conversion ( $\leq 2$ years) (1.5%) . The  
131 cumulative risk refers to the annual risk of TB reactivation multiplied by the number of years  
132 before the patient reaches an age of 80 years. In addition, provider awareness of risk was  
133 assessed by identifying how many of the above variables were documented by the treating  
134 physician at the initial clinical encounter.

## 135 **Analysis**

136 Concordance between TST and IGRA in subjects that received both tests was analyzed by  
137 McNemar's test of corrected proportions. Descriptive statistics were analyzed to determine the  
138 characteristics of subjects with a PPV of greater than 50%. Patients were also stratified into Low  
139 (<10%), Intermediate (10% to <50%), and High (50%-100%) cumulative risk categories.

140 Furthermore, percentages of patients in each cumulative risk group completing treatment were  
141 calculated. Fisher's exact test was used to determine the association between the types of drug  
142 regimen with treatment completion rates. Logistic regression analysis was performed to examine  
143 the association between provider assessment of an individual clinical risk factor and the patient's  
144 likelihood of completing the treatment. All statistical analyses were conducted using SAS 9.4  
145 (SAS Institute, Cary, NC), two-sided with a significance level of 0.05.

146

## 147 **RESULTS**

### 148 **Characteristics of the study subjects**

149 **Table 1** shows the baseline demographic information for the study subjects. The median age was  
150 49 years and a little less than half were female (43.31%). Of the 125 patients included, 94 were  
151 from the US and US territories, 32 were non-US born and 1 subject had no documentation of  
152 country of origin. Of the US-born individuals most were Caucasian (52%) or African American  
153 (43%). The mean age at immigration for non-US born subjects was 29.22 years. TST data were  
154 available on 69 and IGRA data on 91 subjects. Of all 35 TST positive subjects who also had  
155 IGRA results available, 19 were IGRA positive, 13 were IGRA negative and 1 indeterminate .  
156 The Only 2 subjects with positive IGRA had a negative TST result (**Figure 1**). There was  
157 significant discordance between the two tests (  $p = 0.0045$ ,McNemar's test) in subjects who  
158 underwent both TST and IGRA for diagnosis .There were 90 subjects who had a single test  
159 performed (either IGRA or TST) of whom 56 (44%) had a positive IGRA (either a Quantiferon-  
160 TB Gold or T-spot TB) and 34 (27%) had a positive TST. The majority of patients who received

161 an IGRA received the QuantiFERON-TB Gold test. 5 patients received both the Quantiferon-TB  
162 Gold and the T-spot TB test.

163

## 164 **Positive Predictive Value of TST**

165 Most foreign born subjects who underwent only TST were from high or intermediate TB burden  
166 countries and consequently had a PPV value of 50% or greater for being TST positive.

167 Therefore, *tstin3d.com* was primarily useful for calculating the PPV in 22 US-born subjects who  
168 had a positive TST with either IGRA not done or indeterminate. Of the US born subjects who  
169 were diagnosed only by TST alone, higher number of Non-Hispanic Black/African-American  
170 subjects were in the >50% PPV group compared to those with PPV<50%. This was likely due to  
171 the higher risk assigned by the calculator to the Non-Hispanic Black/African-Americans with a  
172 positive TST.

173

## 174 **Risk of Reactivation**

175 The overall distribution of risk factors in the study patients comparing US born with immigrants  
176 is shown in **Figure 2**. Subjects with HIV, diabetes, history of smoking, taking a TNF- $\alpha$  inhibitor  
177 and on transplant immunosuppression were more common in US born subjects compared to  
178 immigrants. The calculator allowed us to divide subjects with LTBI into “Low (<10% risk),”  
179 “Intermediate (10-<50% risk),” and “High (50-100% risk)” cumulative risk groups. All patients  
180 with AIDS had the highest annual (>10%) and cumulative (>50%) risk. The calculator assigns a  
181 slightly increased risk to African Americans compared to age and sex matched Caucasians and a



182 larger proportion of African Americans (20% and 43%) were in the highest annual (>10%) and  
183 cumulative risk category (>50%) compared to Caucasians (2% and 16%). However, this was  
184 primarily because of the significantly increased prevalence of HIV/AIDS noted in this population  
185 (15/42, 37.5%) compared to the Caucasian population (4/49, 8.2%) (p=0.001 Fisher exact test).  
186 **Table 2** shows characteristics of all the patients in the High cumulative risk group. Furthermore,  
187 for all patients who tested positive on TST but negative on IGRA, the median cumulative risk  
188 was 19% suggesting that they were not in the high risk group.

189

## 190 **Risk Factors and Treatment Completion in Specific High risk groups**

### 191 **Subjects on TNF- $\alpha$ blockers and LTBI**

192 Data were available for 20 subjects with LTBI on TNF $\alpha$  blockers. A significantly higher  
193 proportion (75%) of subjects on TNF $\alpha$  blockers (TNF $\alpha$  group) were seen because of recent (< 2  
194 years ago) TST/IGRA conversion from negative to positive, compared to 17.5% in the control  
195 group (76 HIV-negative subjects not on any immunosuppressive therapy, p=0.002, Fisher exact  
196 test). The distribution of other pertinent risk factors were as follows between the TNF $\alpha$  group  
197 and control group: diabetes (6% vs. 26%), smoking >1 pack per day (6% vs. 11%), and renal  
198 failure (0% vs. 6%). The median cumulative risk of progression to active TB was 17.25% in the  
199 TNF $\alpha$  group (range: 8.6 – 51.7%) and 5.6% in the control group (range: 0.1 – 100%). 70% of  
200 patients were able to successfully complete LTBI therapy in the TNF $\alpha$  group. This could be due  
201 to close follow up in the rheumatology clinic.

202

203

## 204 **Subjects with HIV and LTBI**

205 Of the HIV positive population with LTBI, 10 of 20 had AIDS. The median annual TB-risk  
206 amongst HIV, AIDS, and HIV-uninfected patients was 8% (3-8%), 22% (21-25%), and 0.5% (0-  
207 6%). More patients with HIV/AIDS smoked >1 pack-per-day (HIV/AIDS: 30%, HIV-uninfected:  
208 13%). Other risk-factors distributed amongst HIV, AIDS and HIV-uninfected groups: recent  
209 TST/IGRA conversion (10%, 30%, and 28%), renal-failure requiring hemodialysis (0%, 10%,  
210 and 0%), and diabetes (0%, 10%, 25 %). Most HIV positive patients were prescribed 9H  
211 (HIV/AIDS: 85%, HIV-uninfected: 39 %). The median treatment-days were longer (274 vs. 117  
212 days) but the rates of treatment completion were comparable for HIV/AIDS than HIV-uninfected  
213 patients (30% vs. 34%). Reasons HIV/AIDS patients stopped therapy included loss to follow-up  
214 (2/6), cost (1/6), hepatitis (1/6), rash (1/6), and clinical contraindications (1/6).

215

## 216 **Hepatitis while on LTBI treatment**

217 The calculated risk of INH induced hepatitis correlates with the age of the patient more than any  
218 of the other risk factors. Of the five patients that developed elevated LFTs, all were above 38  
219 years of age with three being above 65 years. Only one was on INH and four were on rifampin.  
220 The calculator estimated a risk of hepatitis of 1.2% for two of these subjects, 5% for two and  
221 2.3% for one subject. Each patient was concomitantly using at least one other potentially  
222 hepatotoxic medication.

223

## 224 **Treatment completion**

225 Of the 125 subjects included in the analysis, 8 were not offered any treatment and 3 refused. 59  
226 of 114 (52%) subjects were started on treatment with INH, 24 (21%) on 3HP, 23 (20%) on

227 Rifampin and 8 (7%) on Rifabutin. 69 (61%) subjects completed the recommended duration of  
228 therapy during the study period and none developed active TB. The completion rates of those  
229 treated for LTBI were the best for 3HP and worst for Rifabutin, 75% and 50% subjects  
230 respectively (**Table 3**). Amongst the documented reasons for stopping treatment early (**Figure**  
231 **3**), loss to follow-up accounted for a majority of incomplete treatments (23 subjects). Other  
232 reasons for stopping that were categorized were: elevated liver enzymes, cost/access, minor side  
233 effects (nausea, vomiting, and diarrhea), rash, drug interactions and clinical decision to stop. No  
234 reasons for stopping were documented in 4 subjects. Importantly, no significant differences were  
235 observed between patients completing therapy in the Low, Intermediate and High  
236 cumulative risk groups as shown in **Table 4** ( $p=0.54$ , Chi-square test for trends).

237

### 238 **Provider risk documentation**

239 For analysis of whether a specific risk factor was assessed by the ID clinic provider, we  
240 queried the electronic medical record for documentation of risk factors in the written clinical  
241 assessment by the health care provider. As shown in **Table 5**, BCG status was documented for  
242 only 15 of 32 immigrants. Less than half of the patients' initial encounter included documented  
243 information about country of birth, HIV/AIDS status, recent TST/IGRA conversion, young age  
244 at infection, recent TST/IGRA conversion ( $\leq 2$  years ago) and history of cancer. Hyperglycemia  
245 and renal failure were assumed to be assessed if the provider had access to a blood test for basic  
246 metabolic panel at or within 3 months prior to seeing the patient. Most patients were assessed for  
247 smoking and malnutrition and had received a chest X-ray at or within 3 months of their  
248 Infectious Diseases clinic visit. As shown in **Table 6**, logistic regression analysis showed that  
249 there was no statistically significant association of risk factor assessment in the clinic at initial

250 visit with the probability of subjects completing treatment. However, as shown by the higher  
251 Odds Ratios, documentation of immunosuppression (HIV/AIDS, steroids, transplant related  
252 immunosuppression) as well as documentation of smoking and recent ( $\leq 2$  years) TST/IGRA  
253 conversion were associated with a better chance of completing treatment.

254

## 255 **Discussion**

256 In this study we retrospectively applied the validated risk calculator (tstin3d.com), to describe  
257 the distribution of clinical risk factors contributing to increased annual and cumulative risk of  
258 progression to active TB disease, in patients with LTBI seen at the Saint Louis University  
259 outpatient Infectious Diseases (ID) clinic over a 5 year time period. We were also able to  
260 measure rates of treatment completion in the groups with differing cumulative risk. Finally, we  
261 measured the frequency with which different risk factors were documented at initial visit by the  
262 healthcare provider in the ID clinic. Subjects were included only if they had a documented  
263 positive TST/IGRA result available at or prior to their clinic visit, had no clinical evidence of  
264 active TB (as documented by the ID clinic physician) and had no prior history of treatment for  
265 either active TB or LTBI. Our study demonstrates that tstin3d.com can be used for systematic  
266 assessment of major risk factors for progression to active TB in subjects with LTBI and divide  
267 subjects with LTBI into Low, Intermediate and High cumulative risk groups based on the  
268 presence or absence of a combination of clinical risk factors. Our data show that current standard  
269 of care practice did not result in higher treatment completion rates for patients in the High risk  
270 group-an important goal of TB control in low burden countries. Evaluation of any particular risk  
271 factor was not associated with improved treatment completion but this could be because

272 providers often select regimens based on side effect profiles of drugs rather than the patient's  
273 risk of progression to active TB. We speculate that provider awareness of a numerical risk for  
274 patients with LTBI can allow them to use short course LTBI treatment regimens more cost-  
275 effectively, ensuring completion in the highest risk group, an approach that needs to be tested in  
276 future prospective studies.

277 For patients undergoing TST, the calculator ([tstin3d.com](http://tstin3d.com)) facilitates interpretation of risk by  
278 taking into account the TST size, PPV of TST and risk of development of disease. A PPV >50%  
279 leads to an increased cumulative risk. A default PPV>98% is assigned, however, by the  
280 calculator in those with a positive IGRA. This is one limitation of the calculator as recent studies  
281 have shown that false positive IGRAs remain a concern among specific groups assessed for  
282 LTBI [10]. We found significant discordance between PPD and IGRA positivity in our study in  
283 keeping with results obtained by others [11, 12]. We found the PPV calculated by the calculator  
284 to be most useful in stratifying US born subjects who underwent TST as their sole test for  
285 assessment of TB infection as BCG vaccination is not routinely offered in the US. Although the  
286 calculator was primarily developed to overcome the limitations of TST interpretation [8], we  
287 utilized it firstly, to retrospectively assess the percentage of patients with LTBI in Low,  
288 Intermediate and High individual cumulative risk groups. We then measured the percentage of  
289 patients finishing LTBI treatment in the different risk groups. We noted equivalent rates of  
290 treatment completion between the different risk groups which raises the possibility  
291 that [tstin3d.com](http://tstin3d.com) use by providers might help select targeted strategies to ensure completion in the  
292 high risk group. ID clinic assessment of any particular risk factor was not associated with  
293 treatment completion but this might be due to the relatively small sample size of our population.  
294 However, we noted non-significant but higher odds of completing treatment in patients assessed

295 for immunosuppression and recent TST/IGRA conversion. Current CDC guidelines define  
296 specific risk groups which should be given high priority for LTBI treatment based on TST size  
297 and/or IGRA positivity and clinical risk factors [13]. However, as shown in our study, most of  
298 these risk factors may not be systematically assessed by the busy clinician in all patients with  
299 LTBI. Freely available web based tools like [tstin3d.com](http://tstin3d.com) may therefore, facilitate a  
300 comprehensive assessment of risk factors for TB progression [6]. This, in turn, may affect the  
301 choice of regimen and the intensity of follow up provided to the patients when healthcare  
302 providers become aware of those at high cumulative risk of progression. Although lack of  
303 adequate healthcare as well as patient related factors have been reported to affect adherence to  
304 LTBI treatment [6, 14, 15], specific interventions like shorter duration of therapy using  
305 Rifamycin based regimens and directly observed treatment (DOT) are well recognized measures  
306 to improve treatment adherence [16-18]. This approach also minimizes the loss to follow up  
307 which was the major reason for incomplete treatment in our cohort.

308 In agreement with the published literature on adherence with 3HP based regimens, we found the  
309 highest rates of treatment completion in subjects prescribed 3HP compared to those receiving  
310 INH or Rifampin. Surprisingly, we saw low rates of treatment completion seen with Rifampin or  
311 Rifabutin only regimens. Cytochrome P (CYP) 450 isoenzyme induction by Rifamycin based  
312 regimens remains a concern in subjects with HIV on ARVs. This is especially important as more  
313 than 85% of subjects with HIV/AIDS were prescribed INH and only 30% were able to complete  
314 treatment in our study. Current US guidelines recommend use of 3HP only with efavirenz (EFV)  
315 - or raltegravir (RAL)-based regimens (in combination with either abacavir/lamivudine  
316 [ABC/3TC] or tenofovir disoproxil fumarate/emtricitabine [TDF/FTC]) for treatment of LTBI  
317 [18]. Allowing for drug resistance testing and patient adherence factors, a future strategy of

318 temporarily switching HIV positive patients to the above mentioned regimens could allow better  
319 treatment completion rates with a 3HP based regimen.

320 Subjects on TNF- $\alpha$  blockers are another high risk group at risk for TB disease reactivation. The  
321 majority of subjects with LTBI in our study were referred because of recent TST/IGRA  
322 conversion (within  $\leq 2$ years) which put them at an even higher risk of TB reactivation disease.  
323 Rifamycin based regimens have recently been shown to be effective with minimal side effects in  
324 this group of patients [19]. Although only 25% of patients on TNF- $\alpha$  blockers were prescribed  
325 3HP, 70% were able to successfully complete LTBI therapy. This is likely due to close clinic  
326 follow-up that these patients receive for their underlying autoimmune disease.

327 Two important limitations of our study are the retrospective nature of the study and that subjects  
328 already receiving care for co-morbid conditions at different clinics were referred to our  
329 Infectious Diseases clinic, making them more likely to seek healthcare. These subjects are  
330 therefore more likely to have higher rates of LTBI treatment completion compared to the overall  
331 population of subjects with LTBI. Furthermore, as patients were often referred from community  
332 and other specialty clinics, ID clinic providers were often aware of medical comorbidities for e.g.  
333 HIV/AIDS, Diabetes, renal failure on dialysis, and ongoing use of TNF- $\alpha$  blocker use at initial  
334 clinic assessment. Therefore we could not properly assess the actual frequency with which these  
335 risk factors would be assessed had the provider not been made aware beforehand. Nevertheless,  
336 we used relatively strict criteria for inclusion of subjects with previously untreated LTBI in our  
337 study and had follow up data on the majority of our study cohort. Our study suggests that  
338 [tstin3d.com](http://tstin3d.com) could be used in future prospective studies for determining a numerical risk of TB  
339 progression in patients with LTBI for improved provider awareness of those at high risk.  
340 Furthermore, prospective design would also allow for testing whether treatment completion rates

341 can be improved by “risk score targeted” treatment (i.e. selecting a 3HP based regimen for all  
342 subjects at high cumulative risk). The utility of “risk score targeted” treatment as a strategy for  
343 decreasing the community burden of TB in the US needs to be validated in future prospective  
344 studies.

## 345 **Acknowledgements**

346 The authors would like to thank Dr. Madhukar Pai and Dr. Dick Menzies for allowing open use  
347 of [tstin3d.com](http://tstin3d.com). This research was supported in part by a HIV Medical Students Program award  
348 awarded to MS by the HIV Medicine Association of the Infectious Diseases Society of America.

## 349 **Figure Legends**

350 **Figure 1.** Showing all subjects included in the study based on whether they had a tuberculin  
351 skin test (TST) performed. Those who tested negative on TST or had no TST results available  
352 had to have a positive Interferon Gamma Release Assay (IGRA) i.e. Quantiferon-TB Gold or T-  
353 spot TB test to be included in the study.

354 **Figure 2.** Showing number of US born (black bars) vs. non-US born (grey bars) subjects with  
355 different risk factors for progression to active TB disease in the overall cohort of patients with  
356 latent TB

357 **Figure 3.** Showing number of patients discontinuing therapy and the primary documented  
358 causes by drug group.

359

360



## 361 References

- 362 1. Corbett, E.L., et al., *The Growing Burden of Tuberculosis*. Archives of Internal Medicine,  
363 2003. **163**(9): p. 1009.
- 364 2. Champion, E.W., et al., *Latent Mycobacterium tuberculosis Infection*. New England Journal  
365 of Medicine, 2015. **372**(22): p. 2127-2135.
- 366 3. Lobue, P. and D. Menzies, *Treatment of latent tuberculosis infection: An update*.  
367 Respirology, 2010. **15**(4): p. 603-22.
- 368 4. Getahun, H., et al., *Management of latent Mycobacterium tuberculosis infection: WHO*  
369 *guidelines for low tuberculosis burden countries*. The European respiratory journal, 2015.  
370 **46**(6): p. 1563-1576.
- 371 5. Salinas, J.L., et al., *Leveling of Tuberculosis Incidence - United States, 2013-2015*.  
372 MMWR Morb Mortal Wkly Rep, 2016. **65**(11): p. 273-8.
- 373 6. Li, J., et al., *Adherence to treatment of latent tuberculosis infection in a clinical*  
374 *population in New York City*. International Journal of Infectious Diseases, 2010. **14**(4): p.  
375 e292-e297.
- 376 7. *Recommendations for use of an isoniazid-rifapentine regimen with direct observation to*  
377 *treat latent Mycobacterium tuberculosis infection*. MMWR Morb Mortal Wkly Rep,  
378 2011. **60**(48): p. 1650-3.
- 379 8. Menzies, D., et al., *Thinking in three dimensions: a web-based algorithm to aid the*  
380 *interpretation of tuberculin skin test results*. Int J Tuberc Lung Dis, 2008. **12**(5): p. 498-  
381 505.
- 382 9. Comstock, G.W., L.B. Edwards, and V.T. Livesay, *Tuberculosis morbidity in the U.S.*  
383 *Navy: its distribution and decline*. Am Rev Respir Dis, 1974. **110**(5): p. 572-80.
- 384 10. Moses, M.W., et al., *Serial testing for latent tuberculosis using QuantiFERON-TB Gold*  
385 *In-Tube: A Markov model*. Sci Rep, 2016. **6**: p. 30781.
- 386 11. Talati, N.J., et al., *Poor concordance between interferon- $\gamma$  release assays and tuberculin*  
387 *skin tests in diagnosis of latent tuberculosis infection among HIV-infected individuals*.  
388 BMC Infectious Diseases, 2009. **9**: p. 15-15.
- 389 12. Ribeiro-Rodrigues, R., et al., *Discordance of Tuberculin Skin Test and Interferon Gamma*  
390 *Release Assay in Recently Exposed Household Contacts of Pulmonary TB Cases in*  
391 *Brazil*. PLoS ONE, 2014. **9**(5): p. e96564.
- 392 13. *Targeted tuberculin testing and treatment of latent tuberculosis infection*. American  
393 Thoracic Society. MMWR Recomm Rep, 2000. **49**(RR-6): p. 1-51.
- 394 14. Makanjuola, T., H.B. Taddese, and A. Booth, *Factors Associated with Adherence to*  
395 *Treatment with Isoniazid for the Prevention of Tuberculosis amongst People Living with*  
396 *HIV/AIDS: A Systematic Review of Qualitative Data*. PLoS ONE, 2014. **9**(2): p. e87166.
- 397 15. Malejczyk, K., et al., *Factors associated with noncompletion of latent tuberculosis*  
398 *infection treatment in an inner-city population in Edmonton, Alberta*. The Canadian  
399 Journal of Infectious Diseases & Medical Microbiology, 2014. **25**(5): p. 281-284.
- 400 16. Sterling, T.R., et al., *Three months of weekly rifapentine and isoniazid for treatment of*  
401 *Mycobacterium tuberculosis infection in HIV-coinfected persons*. Aids, 2016. **30**(10): p.  
402 1607-15.
- 403 17. Sterling, T.R., et al., *Three months of rifapentine and isoniazid for latent tuberculosis*  
404 *infection*. N Engl J Med, 2011. **365**(23): p. 2155-66.

- 405 18. Stuurman, A.L., et al., *Interventions for improving adherence to treatment for latent*  
406 *tuberculosis infection: a systematic review*. BMC Infectious Diseases, 2016. **16**: p. 257.

**Table 1. Characteristics of patients with latent tuberculosis infection**

| <b>Patient Characteristics</b>           |                 | <b>Number (min to max)</b> |
|------------------------------------------|-----------------|----------------------------|
| Median Age (years)                       |                 | 49, Range:22-80            |
| Median age at immigration to USA (years) |                 | 28.5 (3-45)                |
| Height (cm)                              |                 | 170.2 (147.3-195.6)        |
| Weight (kg)                              |                 | 82.5 (47.3-175.1)          |
| BMI (kg/m <sup>2</sup> )                 |                 | 29.15 (18.7-55.39)         |
| <b>Patient demographics</b>              |                 | <b>Number (%)</b>          |
| Sex (Female)                             |                 | 54 (43.2%)                 |
| Ethnicity                                |                 |                            |
| Caucasian                                |                 | 48 (38.4)                  |
| African American/Black                   |                 | 39(31.2)                   |
| Hispanic                                 |                 | 1                          |
| Other                                    |                 | 35(28)                     |
| Unknown                                  |                 | 2(1.6)                     |
| <b>Country of Birth</b>                  |                 | <b>Number</b>              |
|                                          | Bosnia          | 4                          |
|                                          | Burma/Myanmar   | 1                          |
|                                          | Congo           | 2                          |
|                                          | India           | 3                          |
|                                          | Iraq            | 2                          |
|                                          | Ireland         | 1                          |
|                                          | Kenya           | 1                          |
|                                          | Malaysia        | 1                          |
|                                          | Mexico          | 1                          |
|                                          | Nepal           | 3                          |
|                                          | Pakistan        | 2                          |
|                                          | Philippines     | 1                          |
|                                          | Russia          | 1                          |
|                                          | Somalia         | 2                          |
|                                          | Thailand        | 1                          |
|                                          | USA             | 94                         |
|                                          | USA-Puerto Rico | 1                          |
|                                          | Vietnam         | 3                          |
|                                          | Unknown         | 1                          |
| <b>Total</b>                             |                 | <b>125</b>                 |

**Table 2. Distribution of medical risk factors for progression to active TB in subjects in the High (50-100% cumulative risk) group**

| Risk factor                                                                                                                                                                                                                                                                                                                                                                          | Number                                                | Cumulative risk value% |
|--------------------------------------------------------------------------------------------------------------------------------------------------------------------------------------------------------------------------------------------------------------------------------------------------------------------------------------------------------------------------------------|-------------------------------------------------------|------------------------|
| <b>HIV (non AIDS)</b>                                                                                                                                                                                                                                                                                                                                                                | 10                                                    | 100 (Median risk)*     |
| <ul style="list-style-type: none"> <li>• No comorbidities</li> <li>• Smoker</li> <li>• Recent TST conversion (<math>\leq 2</math> years ago)</li> </ul>                                                                                                                                                                                                                              | <p>0</p> <p>2</p> <p>9</p>                            |                        |
| <b>AIDS</b>                                                                                                                                                                                                                                                                                                                                                                          | 10                                                    | 100 (Median risk)*     |
| <ul style="list-style-type: none"> <li>• No comorbidities</li> <li>• Fibronodular disease on chest X-ray +Recent TST conversion (<math>\leq 2</math> years ago)+renal failure on dialysis</li> <li>• Smoker</li> <li>• Smoker+ Recent TST conversion (<math>\leq 2</math> years ago)</li> <li>• Recent TST conversion (<math>\leq 2</math> years ago)</li> <li>• Diabetes</li> </ul> | <p>2</p> <p>1</p> <p>4</p> <p>2</p> <p>6</p> <p>1</p> |                        |
| Recent TST conversion ( $\leq 2$ years ago)+renal failure on dialysis                                                                                                                                                                                                                                                                                                                | 1                                                     | 85.04                  |
| Renal failure on dialysis                                                                                                                                                                                                                                                                                                                                                            | 1                                                     | 70.3                   |
| Recent TST conversion + TNF- $\alpha$ blocker + steroid use                                                                                                                                                                                                                                                                                                                          | 2                                                     | 51.69, 8.61            |
| Immunosuppression after solid organ transplant                                                                                                                                                                                                                                                                                                                                       | 2                                                     | 100, 87.51             |
| Diabetes+ steroid use + solid organ transplant                                                                                                                                                                                                                                                                                                                                       | 1                                                     | 100                    |
| Fibronodular disease on chest X-ray + solid organ transplant                                                                                                                                                                                                                                                                                                                         | 1                                                     | 69.97                  |
| Fibronodular disease on chest X-ray + bone marrow transplant                                                                                                                                                                                                                                                                                                                         | 1                                                     | 76.15                  |

**\*All subjects with HIV and/or AIDS had 100% cumulative risk**

**Table 3. Subjects completing treatment by drug category**

| <b>Drug Regimen</b> | <b>Total number, n</b> | <b>Completed treatment, n (%)</b> |
|---------------------|------------------------|-----------------------------------|
| INH                 | 59                     | 34 (58)                           |
| 3HP                 | 24                     | 18 (75)                           |
| Rifampin            | 23                     | 13 (57)                           |
| Rifabutin           | 8                      | 4 (50)                            |

**Table 4. Subjects completing treatment for latent tuberculosis divided by risk group**

| <b>Cumulative risk group (RG)</b> | <b>Total number, n</b> | <b>Number started on treatment, n</b> | <b>Completed Treatment, n (% of those started)</b> |
|-----------------------------------|------------------------|---------------------------------------|----------------------------------------------------|
| Low (0 - <10%)                    | 51                     | 45                                    | 27 (60)                                            |
| Intermediate (10 - <50%)          | 46                     | 41                                    | 26 (63)                                            |
| High (50 - 100%)                  | 28                     | 28                                    | 16 (57)                                            |

**Table 5. Subjects with latent tuberculosis who were assessed for the different risk factors by Infectious Diseases clinic providers**

| <b>Risk factor</b>          | <b>Number of Patients specifically Assessed in Clinic (%)</b> |
|-----------------------------|---------------------------------------------------------------|
| QTST                        | 74/125 (59%)                                                  |
| QIGRA                       | 92/125 (74%)                                                  |
| Qage                        | 124/125 (99%)                                                 |
| Qimmigration                | 30/125 (24%)                                                  |
| QBCG( for immigrants)       | 15/32 (47%)                                                   |
| QCountryBirth               | 41/125 (33%)                                                  |
| QTB Contact                 | 64/125 (51%)                                                  |
| QAIDS                       | 24/125 (19%)                                                  |
| QHIV                        | 45/125 (36%)                                                  |
| QCXR                        | 117/125 (94%)                                                 |
| QRenal Failure              | 90/125 (72%)                                                  |
| QDM                         | 43/125 (34%)                                                  |
| QRecent PPD/IGRA conversion | 58/125 (46%)                                                  |
| QSilicosis                  | 0/125 (0%)                                                    |
| QTNFa                       | 37/125 (30%)                                                  |
| QYoungTB                    | 1/125 (0.8%)                                                  |

**Table 6. Logistic regression analysis of relating probability of completion of treatment to assessment of selected individual TB progression risk factors**

| <b>Assessed Risk factor*</b>                | <b>Odds Ratio (Confidence Interval)</b> | <b>p value</b> |
|---------------------------------------------|-----------------------------------------|----------------|
| Renal failure                               | 0.83 (0.35-2.0)                         | 0.67           |
| HIV                                         | 1.83 (0.83-4)                           | 0.13           |
| AIDS                                        | 1.36 (0.53-3.5)                         | 0.52           |
| Chest X-ray available                       | 0.36 (0.082-1.6)                        | 0.18           |
| Diabetes mellitus                           | 0.89 (0.4-1.9)                          | 0.75           |
| Recent TST conversion ( $\leq 2$ years ago) | 0.78 (0.37-1.7)                         | 0.51           |
| On TNF- $\alpha$ blocker                    | 0.72 (0.31-1.7)                         | 0.45           |
| Smoker                                      | 1.2 (0.43-3.4)                          | 0.72           |
| On steroids                                 | 0.99 (0.39-2.5)                         | 0.97           |
| Transplant immunosuppression                | 1.56 (0.2-11.4)                         | 0.67           |

\*Young age at TB and Head and Neck cancer are not included as number of subjects assessed were not enough to include in logistic regression analysis

Figure 1

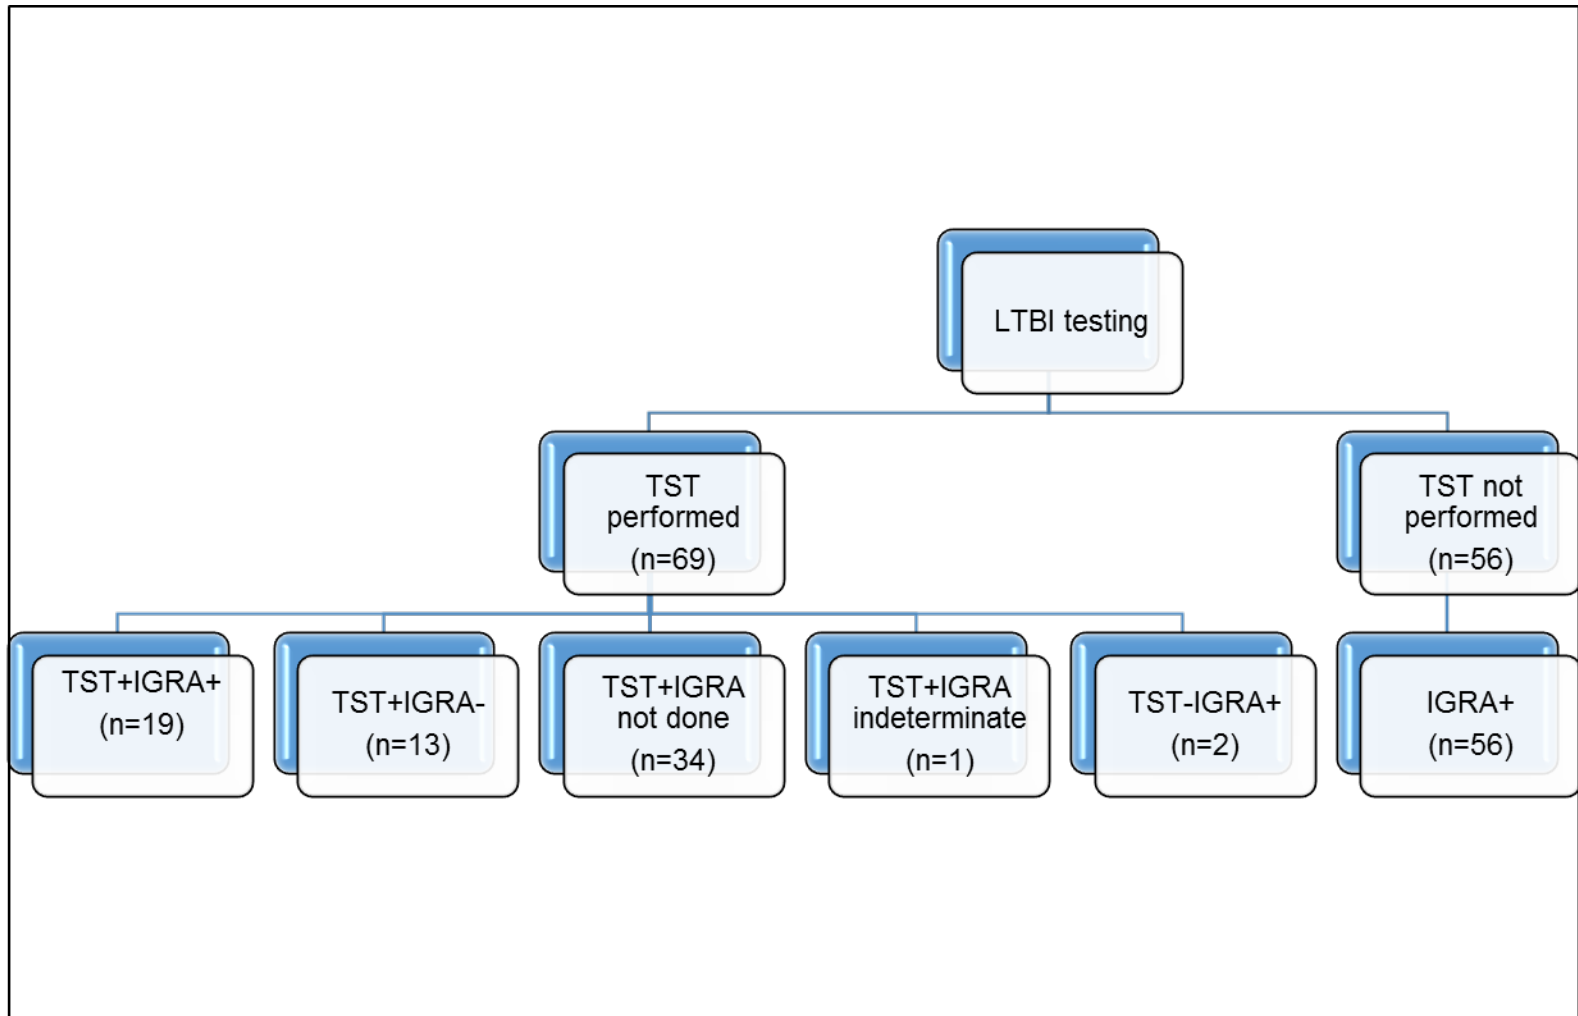



Figure 2

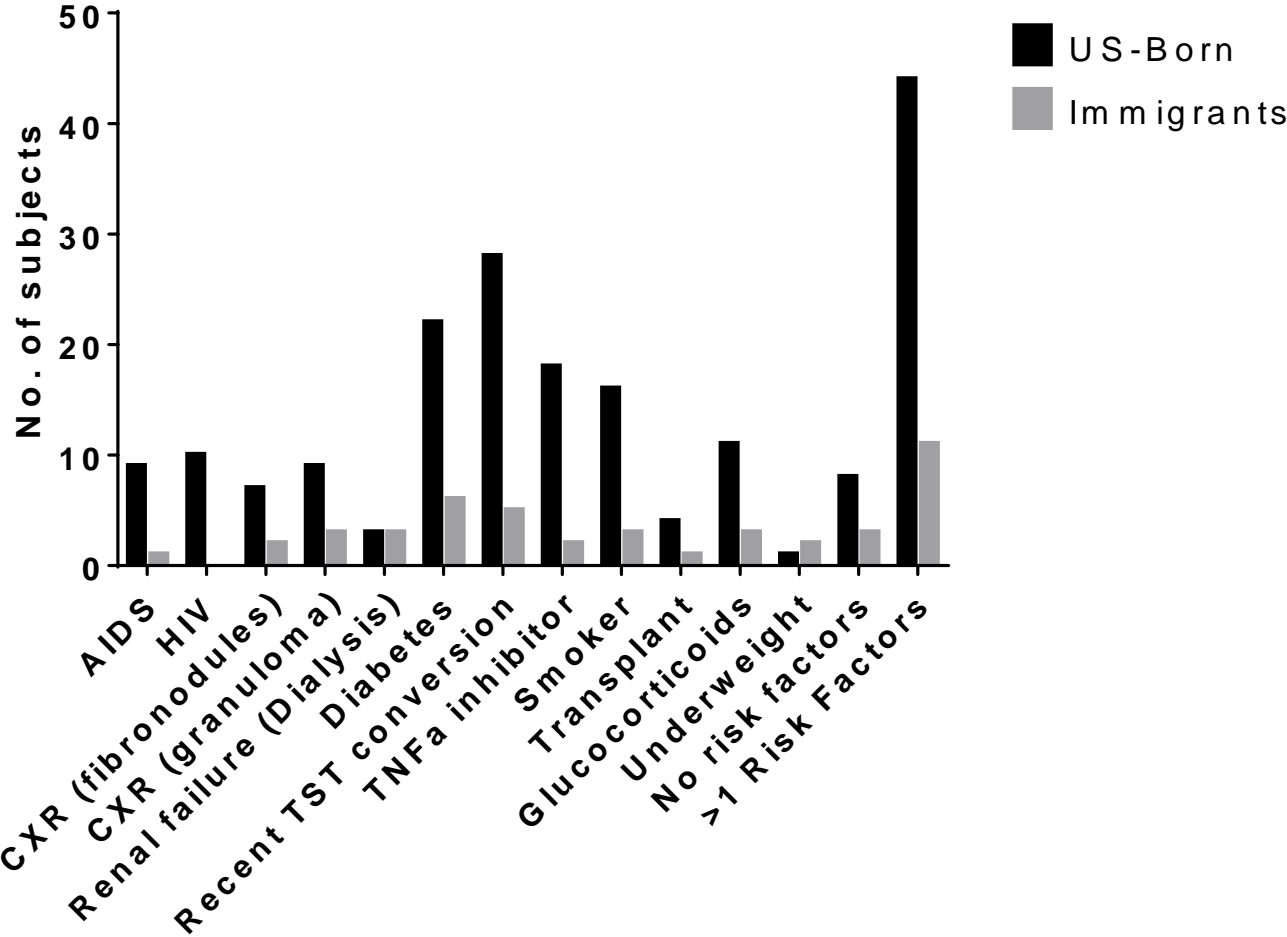

Figure 3

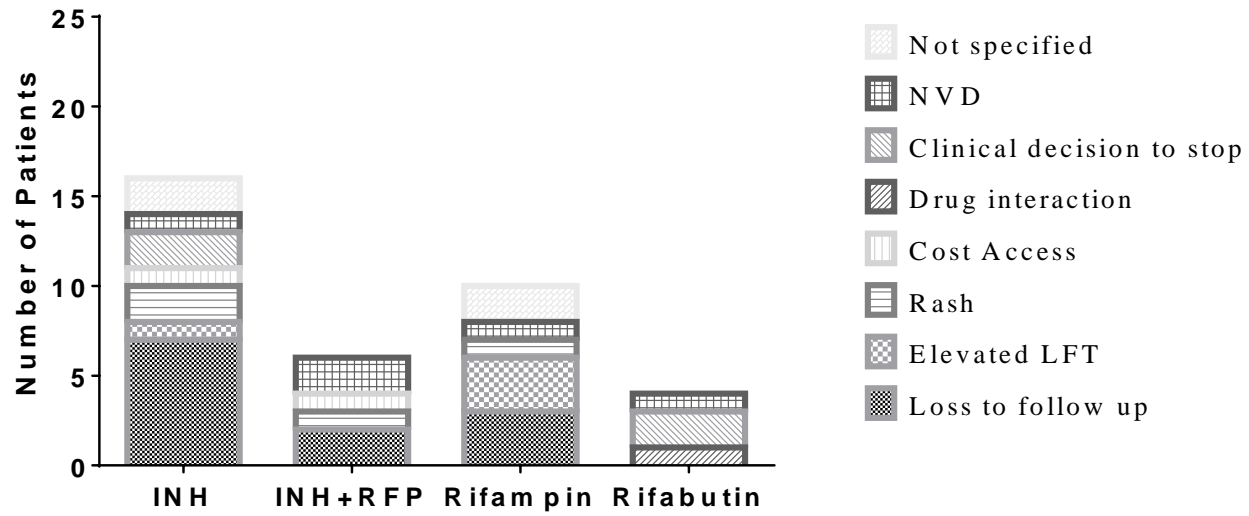

Source: http://biorxiv.org/content/10.1101/207852v1.full.pdf
